# Supplementary material
Source: MDPI journal article supplement (https://www.mdpi.com/2072-4292/14/19/4766)
Supplement: s1 [file s1]

**Supplementary Materials:** Table S1 is the  $\varepsilon_{max}$  of the sites where the latitudes in the literature are consistent with the vegetation in the cold temperate zone of the Greater Khingan Mountains. Table S2, S3 and S4 are the basic values and variation ranges of input parameters of different forest types in the study area.

**Table S1.** The values of maximum light use efficiency of various forest types.

| Forest type                  | Latitude | $\varepsilon_{max}$ |
|------------------------------|----------|---------------------|
| deciduous coniferous forest  | /        | 1.38                |
| deciduous broad-leaved fores | 53.7     | 1.29                |
| mixed forest                 | 51.3     | 0.928               |

**Table S2.** Input parameters descriptions of DNF.

| Number | Parameter              | Basic Value | Min      | Max      |
|--------|------------------------|-------------|----------|----------|
| 1      | TGP                    | 0.2         | 0.16     | 0.24     |
| 2      | LGS                    | 0.2         | 0.16     | 0.24     |
| 3      | LFRT                   | 1           | 0.8      | 1.2      |
| 4      | LWT                    | 0.7         | 0.56     | 0.84     |
| 5      | FM                     | 0.0025      | 0.002    | 0.003    |
| 6      | WPM                    | 0.005       | 0.004    | 0.006    |
| 7      | C:N <sub>leaf</sub>    | 27          | 22.48    | 33.72    |
| 8      | C:N <sub>lit</sub>     | 120         | 97.6     | 146.4    |
| 9      | C:N <sub>fr</sub>      | 58          | 46.4     | 69.6     |
| 10     | C:N <sub>lw</sub>      | 50          | 40       | 60       |
| 11     | C:N <sub>dw</sub>      | 730         | 584      | 876      |
| 12     | DMC <sub>leaf</sub>    | 0.5         | 0.4      | 0.6      |
| 13     | DMC <sub>lit</sub>     | 0.5         | 0.4      | 0.6      |
| 14     | DMC <sub>fr</sub>      | 0.5         | 0.4      | 0.6      |
| 15     | DMC <sub>f</sub>       | 0.5         | 0.4      | 0.6      |
| 16     | DMC <sub>s</sub>       | 0.5         | 0.4      | 0.6      |
| 17     | DMC <sub>lw</sub>      | 0.5         | 0.4      | 0.6      |
| 18     | DMC <sub>dw</sub>      | 0.5         | 0.4      | 0.6      |
| 19     | Llab                   | 0.31        | 0.248    | 0.372    |
| 20     | Lcel                   | 0.45        | 0.36     | 0.54     |
| 21     | FR <sub>lab</sub>      | 0.34        | 0.272    | 0.408    |
| 22     | FR <sub>cel</sub>      | 0.44        | 0.352    | 0.528    |
| 23     | F <sub>lab</sub>       | 0.31        | 0.248    | 0.372    |
| 24     | F <sub>cel</sub>       | 0.45        | 0.36     | 0.54     |
| 25     | DW <sub>cel</sub>      | 0.71        | 0.568    | 0.852    |
| 26     | W <sub>int</sub>       | 0.045       | 0.036    | 0.054    |
| 27     | k                      | 0.51        | 0.408    | 0.612    |
| 28     | SPLR                   | 2.6         | 2.08     | 3.12     |
| 29     | LAI <sub>all:pro</sub> | 2           | 1.6      | 2.4      |
| 30     | FLNR                   | 0.088       | 0.0704   | 0.1056   |
| 31     | g <sub>smax</sub>      | 0.006       | 0.0048   | 0.0072   |
| 32     | g <sub>cl</sub>        | 0.00006     | 0.000048 | 0.000072 |
| 33     | g <sub>bl</sub>        | 0.09        | 0.072    | 0.108    |
| 34     | SW                     | 25          | 20       | 30       |
| 35     | R <sub>dmax</sub>      | 3           | 2.4      | 3.6      |
| 36     | GR                     | 0.3         | 0.24     | 0.36     |
| 37     | MR <sub>pern</sub>     | 0.218       | 0.1744   | 0.2616   |
| 38     | NSC:SC <sub>max</sub>  | 0.1         | 0.08     | 0.12     |

|    |                     |      |       |       |
|----|---------------------|------|-------|-------|
| 39 | NSC <sub>MR</sub>   | 0.3  | 0.24  | 0.36  |
| 40 | SWC <sub>lim2</sub> | 0.4  | 0.32  | 0.48  |
| 41 | VPD <sub>s</sub>    | 610  | 488   | 732   |
| 42 | VPD <sub>c</sub>    | 3100 | 2480  | 3720  |
| 43 | TR <sub>wsl</sub>   | 0.01 | 0.008 | 0.012 |
| 44 | TR <sub>cwl</sub>   | 0.01 | 0.008 | 0.012 |
| 45 | SLA1                | 22   | 17.6  | 26.4  |
| 46 | SLA2                | 8.2  | 6.56  | 9.84  |
| 47 | SLA3                | 8.2  | 6.56  | 9.84  |
| 48 | SLA4                | 8.2  | 6.56  | 9.84  |
| 49 | SLA5                | 8.2  | 6.56  | 9.84  |
| 50 | SLA6                | 8.2  | 6.56  | 9.84  |
| 51 | SLA7                | 8.2  | 6.56  | 9.84  |

Table S3. Input parameters descriptions of DBF.

| Number | Parameter             | Basic Value | Min      | Max      |
|--------|-----------------------|-------------|----------|----------|
| 1      | TGP                   | 0.2         | 0.16     | 0.24     |
| 2      | LGS                   | 0.2         | 0.16     | 0.24     |
| 3      | LFRT                  | 1           | 0.8      | 1.2      |
| 4      | LWT                   | 0.7         | 0.56     | 0.84     |
| 5      | FM                    | 0.0025      | 0.002    | 0.003    |
| 6      | WPM                   | 0.005       | 0.004    | 0.006    |
| 7      | C:N <sub>leaf</sub>   | 25          | 20       | 30       |
| 8      | C:N <sub>lit</sub>    | 55          | 44       | 66       |
| 9      | C:N <sub>fr</sub>     | 48          | 38.4     | 57.6     |
| 10     | C:N <sub>lw</sub>     | 50          | 40       | 60       |
| 11     | C:N <sub>dw</sub>     | 550         | 440      | 660      |
| 12     | DMC <sub>leaf</sub>   | 0.5         | 0.4      | 0.6      |
| 13     | DMC <sub>lit</sub>    | 0.5         | 0.4      | 0.6      |
| 14     | DMC <sub>fr</sub>     | 0.5         | 0.4      | 0.6      |
| 15     | DMC <sub>f</sub>      | 0.5         | 0.4      | 0.6      |
| 16     | DMC <sub>s</sub>      | 0.5         | 0.4      | 0.6      |
| 17     | DMC <sub>lw</sub>     | 0.5         | 0.4      | 0.6      |
| 18     | DMC <sub>dw</sub>     | 0.5         | 0.4      | 0.6      |
| 19     | L <sub>lab</sub>      | 0.38        | 0.304    | 0.456    |
| 20     | L <sub>cel</sub>      | 0.44        | 0.352    | 0.528    |
| 21     | FR <sub>lab</sub>     | 0.34        | 0.272    | 0.408    |
| 22     | FR <sub>cel</sub>     | 0.44        | 0.352    | 0.528    |
| 23     | F <sub>lab</sub>      | 0.38        | 0.304    | 0.456    |
| 24     | F <sub>cel</sub>      | 0.44        | 0.352    | 0.528    |
| 25     | DW <sub>cel</sub>     | 0.77        | 0.616    | 0.924    |
| 26     | W <sub>int</sub>      | 0.045       | 0.036    | 0.054    |
| 27     | k                     | 0.54        | 0.432    | 0.648    |
| 28     | SPLR                  | 2           | 1.6      | 2.4      |
| 29     | LAI <sub>allpro</sub> | 2           | 1.6      | 2.4      |
| 30     | FLNR                  | 0.088       | 0.0704   | 0.1056   |
| 31     | g <sub>smax</sub>     | 0.006       | 0.0048   | 0.0072   |
| 32     | g <sub>cl</sub>       | 0.00006     | 0.000048 | 0.000072 |
| 33     | g <sub>bl</sub>       | 0.009       | 0.0072   | 0.0108   |
| 34     | SW                    | 25          | 20       | 30       |
| 35     | R <sub>dmax</sub>     | 2           | 1.6      | 2.4      |

|    |                       |       |        |        |
|----|-----------------------|-------|--------|--------|
| 36 | GR                    | 0.3   | 0.24   | 0.36   |
| 37 | MR <sub>pern</sub>    | 0.218 | 0.1744 | 0.2616 |
| 38 | NSC:SC <sub>max</sub> | 0.1   | 0.08   | 0.12   |
| 39 | NSC <sub>MR</sub>     | 0.3   | 0.24   | 0.36   |
| 40 | SWC <sub>lim2</sub>   | 0.4   | 0.32   | 0.48   |
| 41 | VPD <sub>s</sub>      | 1100  | 880    | 1320   |
| 42 | VPD <sub>c</sub>      | 3600  | 2880   | 4320   |
| 43 | TR <sub>wsl</sub>     | 0.01  | 0.008  | 0.012  |
| 44 | TR <sub>cwl</sub>     | 0.01  | 0.008  | 0.012  |
| 45 | SLA1                  | 32    | 25.6   | 38.4   |
| 46 | SLA2                  | 32    | 25.6   | 38.4   |
| 47 | SLA3                  | 32    | 25.6   | 38.4   |
| 48 | SLA4                  | 32    | 25.6   | 38.4   |
| 49 | SLA5                  | 32    | 25.6   | 38.4   |
| 50 | SLA6                  | 32    | 25.6   | 38.4   |
| 51 | SLA7                  | 32    | 25.6   | 38.4   |

Table S4. Input parameters descriptions of MF.

| Number | Parameter              | Basic Value | Min      | Max      |
|--------|------------------------|-------------|----------|----------|
| 1      | TGP                    | 0.2         | 0.16     | 0.24     |
| 2      | LGS                    | 0.2         | 0.16     | 0.24     |
| 3      | LFRT                   | 1           | 0.8      | 1.2      |
| 4      | LWT                    | 0.7         | 0.56     | 0.84     |
| 5      | FM                     | 0.0025      | 0.002    | 0.003    |
| 6      | WPM                    | 0.005       | 0.004    | 0.006    |
| 7      | C:N <sub>leaf</sub>    | 26.2        | 20.96    | 31.44    |
| 8      | C:N <sub>lit</sub>     | 94          | 75.2     | 112.8    |
| 9      | C:N <sub>fr</sub>      | 54          | 43.2     | 64.8     |
| 10     | C:N <sub>Iw</sub>      | 50          | 40       | 60       |
| 11     | C:N <sub>dw</sub>      | 658         | 526.4    | 789.6    |
| 12     | DMC <sub>leaf</sub>    | 0.5         | 0.4      | 0.6      |
| 13     | DMC <sub>lit</sub>     | 0.5         | 0.4      | 0.6      |
| 14     | DMC <sub>fr</sub>      | 0.5         | 0.4      | 0.6      |
| 15     | DMC <sub>f</sub>       | 0.5         | 0.4      | 0.6      |
| 16     | DMC <sub>s</sub>       | 0.5         | 0.4      | 0.6      |
| 17     | DMC <sub>Iw</sub>      | 0.5         | 0.4      | 0.6      |
| 18     | DMC <sub>dw</sub>      | 0.5         | 0.4      | 0.6      |
| 19     | L <sub>lab</sub>       | 0.338       | 0.2704   | 0.4056   |
| 20     | L <sub>cel</sub>       | 0.446       | 0.3568   | 0.5352   |
| 21     | FR <sub>lab</sub>      | 0.34        | 0.272    | 0.408    |
| 22     | FR <sub>cel</sub>      | 0.44        | 0.352    | 0.528    |
| 23     | F <sub>lab</sub>       | 0.338       | 0.2704   | 0.4056   |
| 24     | F <sub>cel</sub>       | 0.446       | 0.3568   | 0.5352   |
| 25     | DW <sub>cel</sub>      | 0.734       | 0.5872   | 0.8808   |
| 26     | W <sub>int</sub>       | 0.045       | 0.036    | 0.054    |
| 27     | k                      | 0.522       | 0.4176   | 0.6264   |
| 28     | SPLR                   | 2.36        | 1.888    | 2.832    |
| 29     | LAI <sub>all:pro</sub> | 2           | 1.6      | 2.4      |
| 30     | FLNR                   | 0.088       | 0.0704   | 0.1056   |
| 31     | g <sub>smax</sub>      | 0.006       | 0.0048   | 0.0072   |
| 32     | g <sub>cl</sub>        | 0.00006     | 0.000048 | 0.000072 |

---

|    |                       |        |         |         |
|----|-----------------------|--------|---------|---------|
| 33 | g <sub>bl</sub>       | 0.0576 | 0.04608 | 0.06912 |
| 34 | SW                    | 25     | 20      | 30      |
| 35 | R <sub>dmax</sub>     | 2.6    | 2.08    | 3.12    |
| 36 | GR                    | 0.3    | 0.24    | 0.36    |
| 37 | MR <sub>pern</sub>    | 0.218  | 0.1744  | 0.2616  |
| 38 | NSC:SC <sub>max</sub> | 0.1    | 0.08    | 0.12    |
| 39 | NSC <sub>MR</sub>     | 0.3    | 0.24    | 0.36    |
| 40 | SWC <sub>lim2</sub>   | 0.4    | 0.32    | 0.48    |
| 41 | VPD <sub>s</sub>      | 806    | 644.8   | 967.2   |
| 42 | VPD <sub>c</sub>      | 3300   | 2640    | 3960    |
| 43 | TR <sub>wsl</sub>     | 0.01   | 0.008   | 0.012   |
| 44 | TR <sub>cwl</sub>     | 0.01   | 0.008   | 0.012   |
| 45 | SLA1                  | 26     | 20.8    | 31.2    |
| 46 | SLA2                  | 17.72  | 14.176  | 21.264  |
| 47 | SLA3                  | 17.72  | 14.176  | 21.264  |
| 48 | SLA4                  | 17.72  | 14.176  | 21.264  |
| 49 | SLA5                  | 17.72  | 14.176  | 21.264  |
| 50 | SLA6                  | 17.72  | 14.176  | 21.264  |
| 51 | SLA7                  | 17.72  | 14.176  | 21.264  |

---
